# Supplementary material
Source: PubMed Central journal article supplement (PMC3989111)
Supplement: NIHMS545272-supplement-Supplementary_Figure_S5.pdf [file NIHMS545272-supplement-Supplementary_Figure_S5.pdf]

**mm1116** (chr10:20960405-20962514)  
blood traits  
rs7775698 (*HBS1L-MYB*)  
PMID 23263863, 20927387, 19853236

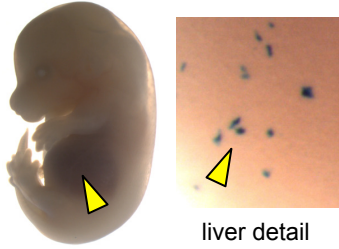

liver detail

liver (7/9 embryos)

**mm1117** (chr11:24034297-24037888)  
fetal erythrocyte levels  
rs1427407 (*BCL11A*)  
PMID 21326311, 17767159

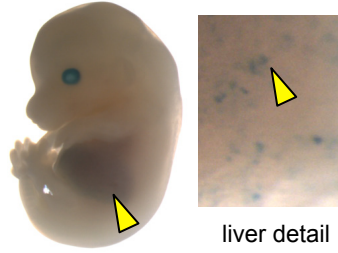

liver detail

liver (8/9 embryos)

**mm1119** (chr10:17314630-17317822)  
adiponectin levels  
rs592423 (*CITED2-ATP5F1P6*)  
PMID 22479202

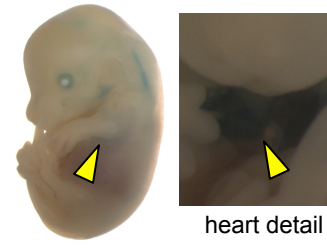

heart detail

heart (3/5 embryos)

**mm1122** (chr14:61171709-61174870)  
depression  
rs9805786 (*SPATA13*)  
PMID 22064162

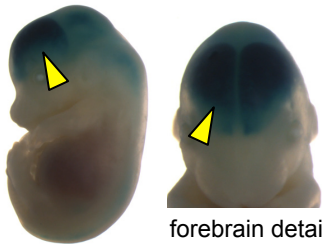

forebrain detail

forebrain (7/7 embryos)

**mm1123** (chr15:59510419-59513351)  
triglycerides  
rs2001945 (*TRIB1-LINC00861*)  
PMID 21909109

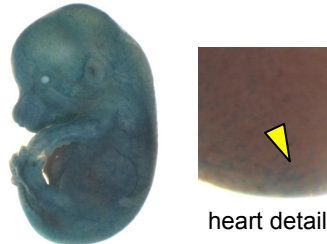

heart detail

heart (3/5); blood vessel (5/5)

**mm1125** (chr19:11801046-11803047)  
folate metabolism  
rs526934 (*TCN1*)  
PMID 19303062, 19744961

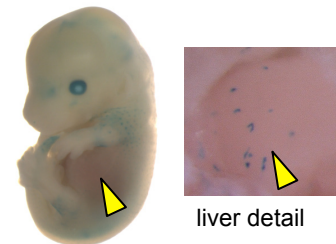

liver detail

liver (4/5 embryos)
