# Supplementary material
Source: PubMed Central journal article supplement (PMC3989111)

A

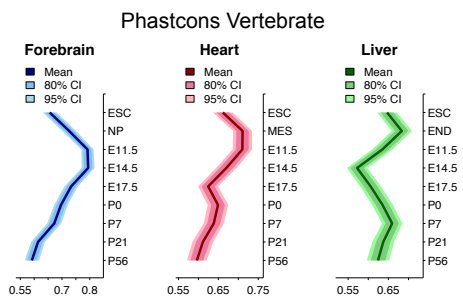

B

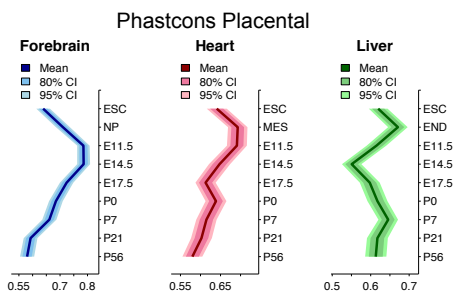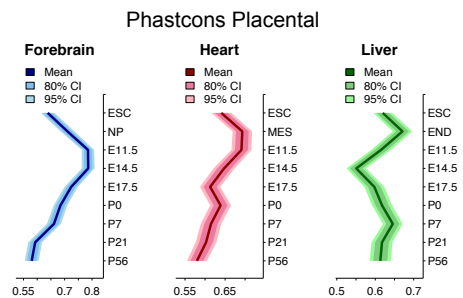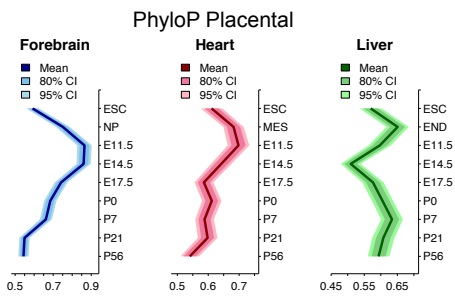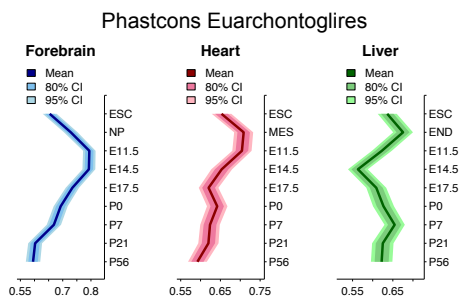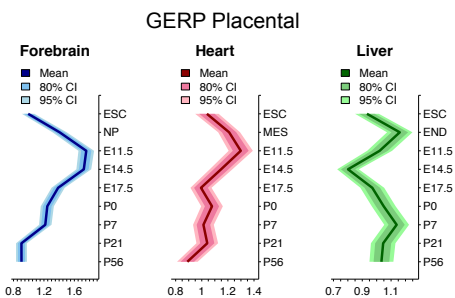

C

**Phastcons Vertebrate 100bp Window Size**

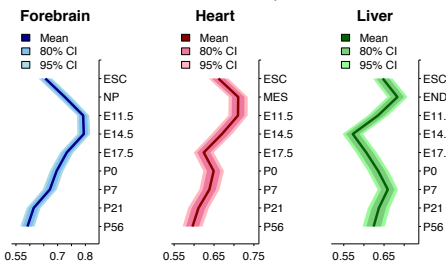

**Phastcons Vertebrate 50bp Window Size**

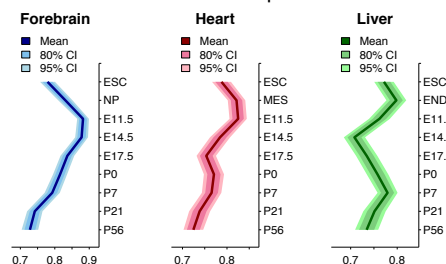

**Phastcons Vertebrate 10bp Window Size**

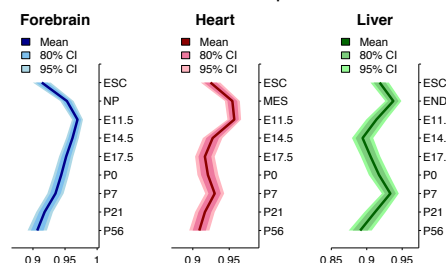

D

**Evolutionary age calculated by 50% homology**

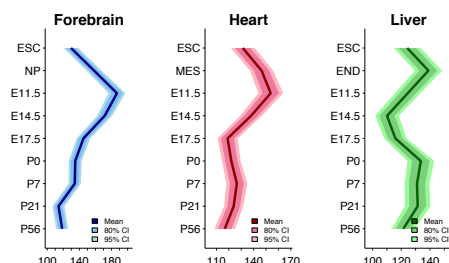

**Evolutionary age calculated by 75% homology**

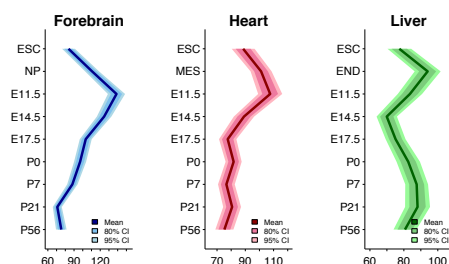

**Evolutionary age calculated by 90% homology**

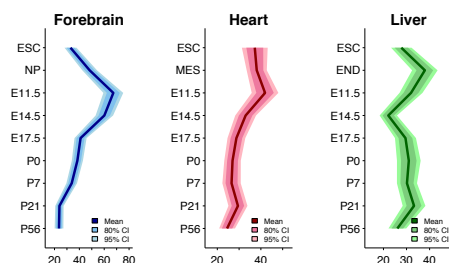

Supplement: NIHMS545272-supplement-Supplementary_Figure_S6.pdf [file NIHMS545272-supplement-Supplementary_Figure_S6.pdf]
