# Supplementary material
Source: PubMed Central journal article supplement (PMC3989111)

A

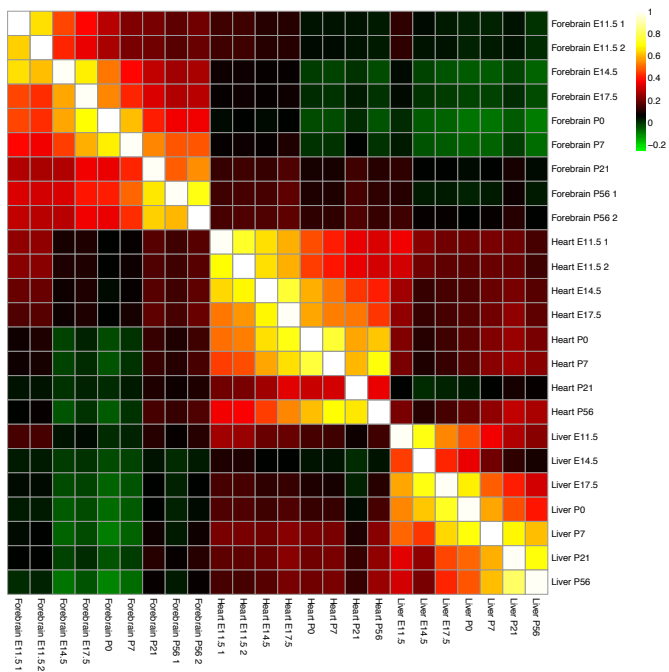

B

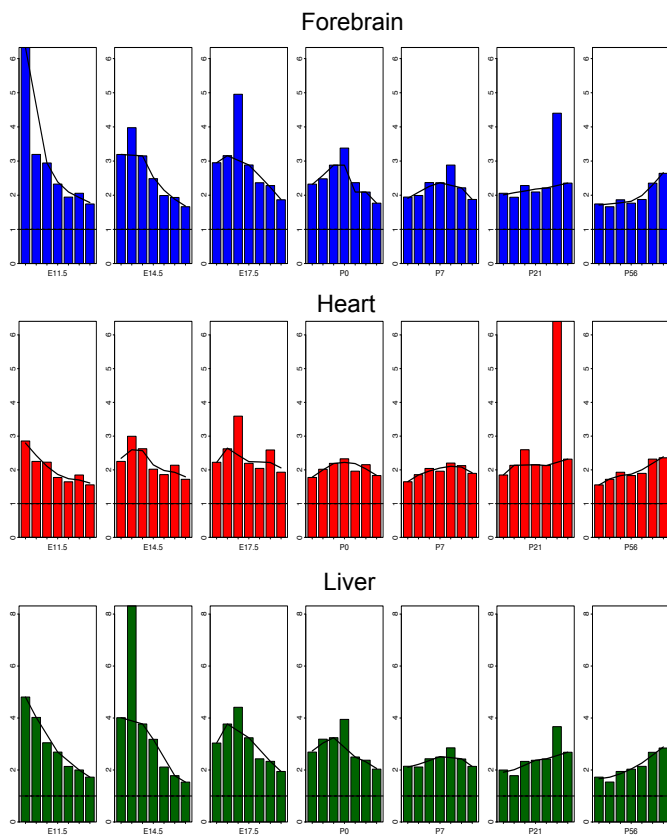

C

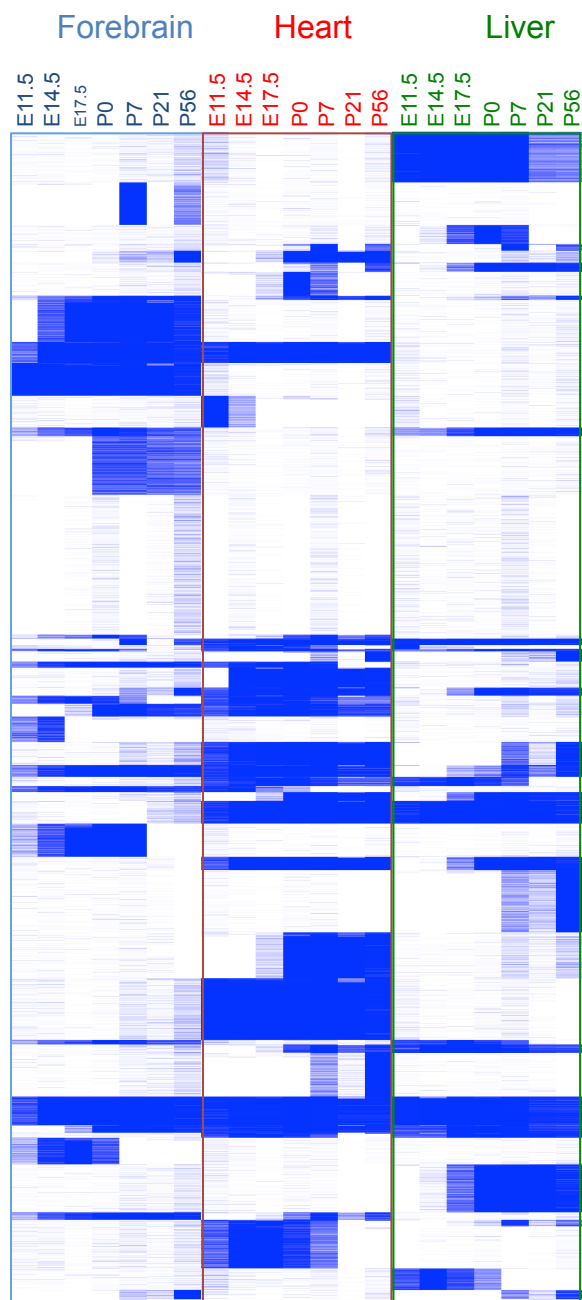

D

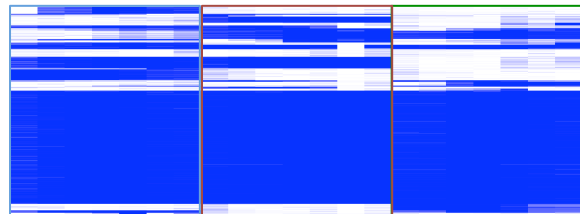

Supplement: NIHMS545272-supplement-Supplementary_Figure_S2.pdf [file NIHMS545272-supplement-Supplementary_Figure_S2.pdf]

## hs822

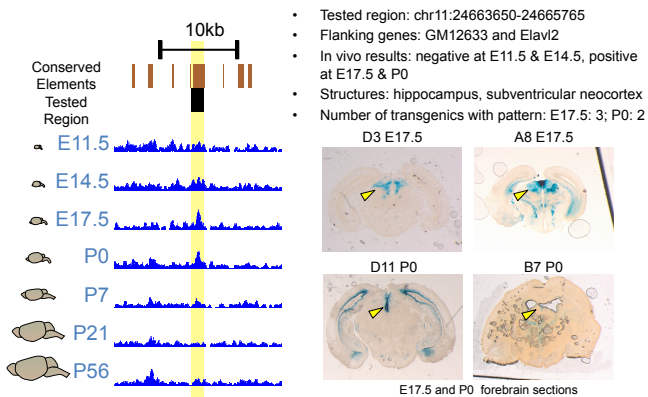

## hs897

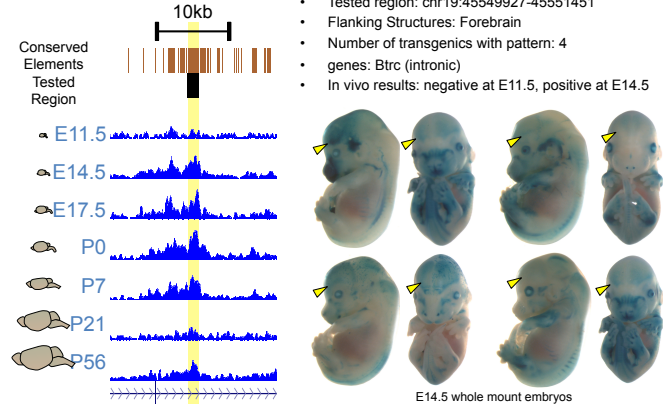

## hs309

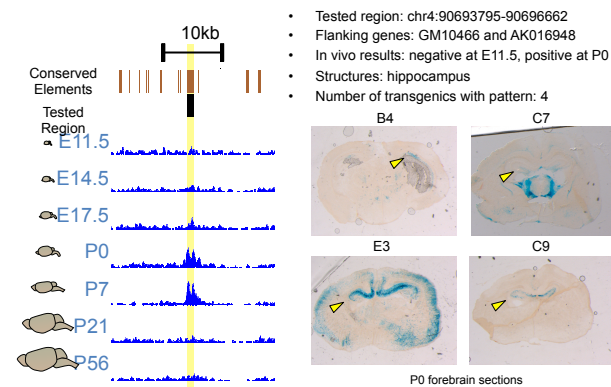

## hs354

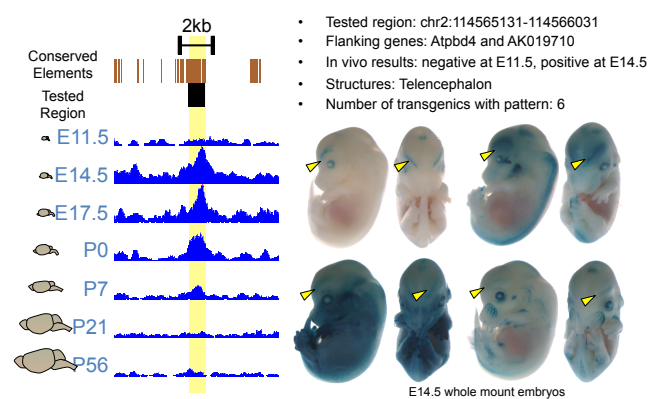

## mm200

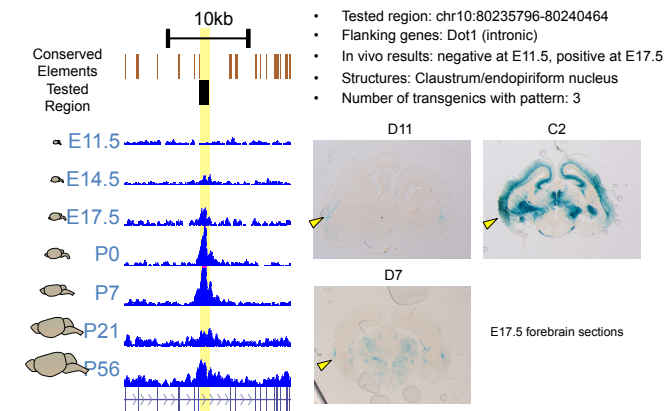

Supplement: NIHMS545272-supplement-Supplementary_Figure_S4.pdf [file NIHMS545272-supplement-Supplementary_Figure_S4.pdf]
